# Supplementary material for: An Analysis of the Reaction of Frogbit (Hydrocharis morsus-ranae L.) to Cadmium Contamination with a View to Its Use in the Phytoremediation of Water Bodies
Source: MDPI journal article supplement (doi:10.3390/app13021197), 2023-01-16
Supplement: s1 [file s1]

**An analysis of the reaction of Frogbit (*Hydrocharis Morsus-Ranae* L.) to cadmium contamination with regard to its use in the phytoremediation of water bodies**

**Table S1.** Meteorological conditions in three consecutive research seasons against the background of long-term averages for the Meteorological Station in Szczecin.

| Growing season | Month                               |       |       |         |
|----------------|-------------------------------------|-------|-------|---------|
|                | VI                                  | VII   | VIII  | VI-VIII |
|                | Average of the air temperature (°C) |       |       | Average |
| 1              | 18.5                                | 22.3  | 17.0  | 19.3    |
| 2              | 18.3                                | 18.2  | 18.3  | 18.3    |
| 3              | 17.6                                | 19.2  | 18.4  | 18.4    |
| 1991-2021      | 17.2                                | 18.8  | 18.4  | 18.1    |
|                | Insolation (h)                      |       |       | Sum     |
| 1              | 298.4                               | 336.2 | 159.4 | 794.0   |
| 2              | 203.8                               | 184.0 | 220.9 | 608.7   |
| 3              | 294.7                               | 286.6 | 168.6 | 749.9   |
| 1966-2018      | 178.6                               | 298.2 | 289.3 | 766.1   |

**Table S2.** The concentration of sediment [ $\mu\text{g g}^{-1}$  d.w.] in the three tested growing seasons.

| Conditions |      | Heavy metal (HM)  |                |                   |                |
|------------|------|-------------------|----------------|-------------------|----------------|
| PNK level  | Term | 0                 |                | Cd                |                |
|            |      | Average           | Standard error | Average           | Standard error |
| low        | I    | 0.30 <sup>a</sup> | 0.002          | 0.30 <sup>a</sup> | 0.002          |
|            | II   | 0.30 <sup>a</sup> | 0.004          | 0.30 <sup>a</sup> | 0.003          |
| high       | I    | 0.30 <sup>a</sup> | 0.003          | 0.30 <sup>a</sup> | 0.003          |
|            | II   | 0.30 <sup>a</sup> | 0.003          | 0.30 <sup>a</sup> | 0.003          |

HM, PNK level, Term, Growing season – statistically insignificant;

LSD<sub>0.05</sub> (Least Significant Difference) for interaction PNK level and Term and HM = 0.01 (F = 0.66; p = 0.420678).

**Table S3.** The linear correlation between concentration of O<sub>2</sub> in water [ $\text{mg dm}^{-3}$ ] and dry weight of *Hydrocharis morsus-ranae* [g] in the three tested growing seasons.

| Conditions |      |                                                    | Linear correlation         |                 |                      |
|------------|------|----------------------------------------------------|----------------------------|-----------------|----------------------|
| PNK level  | Term | Equation                                           | Regression coefficient (r) | Probability (p) | Value of correlation |
| low        | I    | w.d. = $9.637 - 0.752 \cdot \text{C}_{\text{O}_2}$ | r = -0.5663                | p = 0.0566      | -                    |
|            | II   | w.d. = $6.507 - 0.022 \cdot \text{C}_{\text{O}_2}$ | r = -0.0084                | p = 0.9793      | -                    |
| high       | I    | w.d. = $5.571 - 0.226 \cdot \text{C}_{\text{O}_2}$ | r = -0.5210                | p = 0.0824      | -                    |
|            | II   | w.d. = $6.788 - 0.203 \cdot \text{C}_{\text{O}_2}$ | r = -0.5242                | p = 0.0802      | -                    |

C<sub>O2</sub> = O<sub>2</sub> concentration in water.

d.w. = dry weigh.

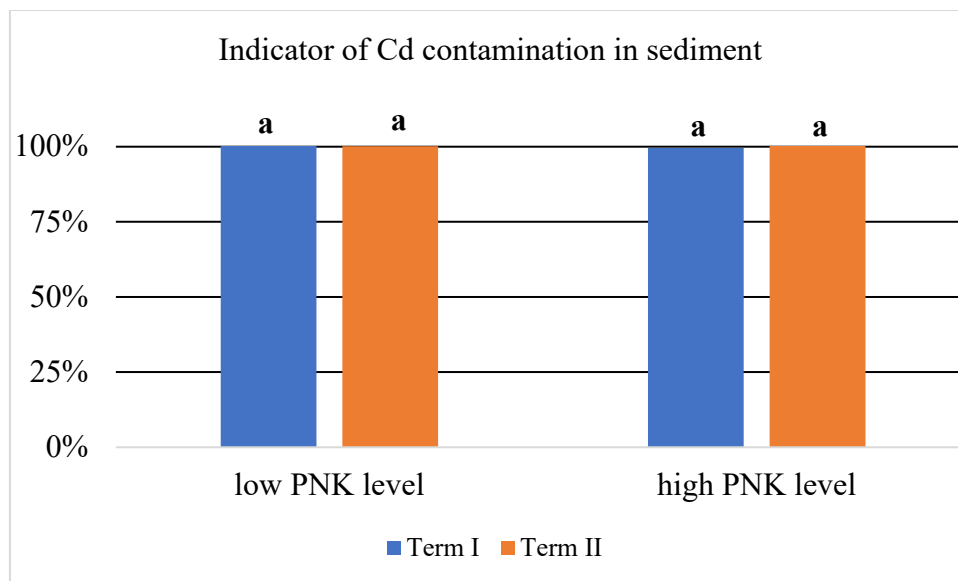

**Figure S1.** The indicator of Cd contamination in sediment in the three tested growing seasons.
